# Supplementary material
Source: ML conference proceedings conference paper supplement (https://proceedings.mlr.press/v97/hanin19a.html)
Supplement: Supplementary file [file hanin19a-supp.pdf]

## A. Formal Statement of Results for General Piecewise Linear Activations

In §5, we stated our results in the case of ReLU activation, and now frame these results for a general piecewise linear non-linearity. We fix some notation. Let  $\phi : \mathbb{R} \rightarrow \mathbb{R}$  be a continuous piecewise linear function with  $T$  breakpoints  $\xi_0 = -\infty < \xi_1 < \xi_2 < \dots < \xi_T < \xi_{T+1} = \infty$ . That is, there exist  $p_j, q_j \in \mathbb{R}$  so that

$$t \in [\xi_j, \xi_{j+1}] \Rightarrow \phi(t) = q_j t + p_j, \quad q_j \neq q_{j+1}. \quad (11)$$

The analog of Theorem 3 for general  $\phi$  is the following.

**Theorem 6.** *Let  $\phi : \mathbb{R} \rightarrow \mathbb{R}$  be a continuous piecewise linear function with  $T$  breakpoints  $\xi_1 < \dots < \xi_T$  as in (11). Suppose  $\mathcal{N}$  is a fully connected network with input dimension  $n_{\text{in}}$ , output dimension 1, random weights and biases satisfying A1 and A2 above, and non-linearity  $\phi$ .*

Let  $J_{z_1, \dots, z_k}$  be the  $k \times n_{\text{in}}$  Jacobian of the map  $x \mapsto (z_1(x), \dots, z_k(x))$ ,

$$\|J_{z_1, \dots, z_k}(x)\| := \det \left( J_{z_1, \dots, z_k}(x) (J_{z_1, \dots, z_k}(x))^T \right)^{1/2},$$

and write  $\rho_{b_{z_1}, \dots, b_{z_k}}$  for the density of the joint distribution of the biases  $b_{z_1}, \dots, b_{z_k}$ . We say a neuron  $z$  is good at  $x$  if there exists a path of neurons from  $z$  to the output in the computational graph of  $\mathcal{N}$  so that each neuron  $\hat{z}$  along this path is open at  $x$  (i.e.  $\phi'(\hat{z}(x) - b_{\hat{z}}) \neq 0$ ).

Then, for any bounded, measurable set  $K \subseteq \mathbb{R}^{n_{\text{in}}}$  and any  $k = 1, \dots, n_{\text{in}}$ , the average  $(n_{\text{in}} - k)$ -dimensional volume

$$\mathbb{E} [\text{vol}_{n_{\text{in}}-k}(\mathcal{B}_{\mathcal{N},k} \cap K)]$$

of  $\mathcal{B}_{\mathcal{N},k}$  inside  $K$  is, in the notation of (6),

$$\sum_{\substack{\text{distinct neurons} \\ z_1, \dots, z_k \text{ in } \mathcal{N}}} \sum_{i_1, \dots, i_k=1}^T \int_K \mathbb{E} [Y_{z_1, \dots, z_k}^{(\xi_{i_1}, \dots, \xi_{i_k})}(x)] dx, \quad (12)$$

where  $Y_{z_1, \dots, z_k}^{(\xi_{i_1}, \dots, \xi_{i_k})}(x)$  equals

$$\|J_{z_1, \dots, z_k}(x)\| \rho_{b_{z_1}, \dots, b_{z_k}}(z_1(x) - \xi_{i_1}, \dots, z_k(x) - \xi_{i_k}) \quad (13)$$

multiplied by the indicator function of the event that  $z_j$  is good at  $x$  for every  $j$ .

Note that if in the definition (11) of  $\phi$  we have that the possible values  $\phi'(t) \in \{q_0, \dots, q_T\}$  do not include 0, then we may ignore the event that  $z_j$  are good at  $x$  in the definition of  $Y_{z_1, \dots, z_k}^{(\xi_{i_1}, \dots, \xi_{i_k})}$ .

**Corollary 7.** *With the notation and assumptions of Theorem 6, suppose in addition that the weights and biases are independent. Fix  $k \in \{1, \dots, n_{\text{in}}\}$  and suppose that for*

*every collection of distinct neurons  $z_1, \dots, z_k$ , the average magnitude of the product of gradients is uniformly bounded:*

$$\sup_{\substack{\text{neurons } z_1, \dots, z_k \\ \text{inputs } x}} \mathbb{E} \left[ \prod_{j=1}^k \|\nabla z_j(x)\| \right] \leq C_{\text{grad}}^k. \quad (14)$$

Then we have the following upper bounds

$$\begin{aligned} & \frac{\mathbb{E} [\text{vol}_{n_{\text{in}}-k}(\mathcal{B}_{\mathcal{N},k} \cap K)]}{\text{vol}_{n_{\text{in}}}(K)} \\ & \leq \binom{\#\{\text{neurons}\}}{k} (T \cdot 2C_{\text{grad}}C_{\text{bias}})^k, \end{aligned} \quad (15)$$

where  $T$  is the number of breakpoints in the non-linearity  $\phi$  of  $\mathcal{N}$  (see (11)) and

$$C_{\text{bias}} = \sup_z \sup_{b \in \mathbb{R}} \rho_{b_z}(b).$$

We prove Corollary 7 in §D and state a final corollary of Theorem 3:

**Corollary 8.** *Suppose  $\mathcal{N}$  is as in Theorem 3 and satisfies the hypothesis (14) in Corollary 7 with constants  $C_{\text{bias}}, C_{\text{grad}}$ . Then, for any compact set  $K \subset \mathbb{R}^{n_{\text{in}}}$  let  $x$  be a uniform point in  $K$ . There exists  $c > 0$  independent of  $K$  so that*

$$\mathbb{E} [\text{distance}(x, \mathcal{B}_{\mathcal{N}})] \geq \frac{cT}{C_{\text{bias}}C_{\text{grad}}\#\{\text{neurons}\}},$$

where, as before,  $T$  is the number of breakpoints in the non-linearity  $\phi$  of  $\mathcal{N}$ .

We prove Corollary 8 in §E. The basic idea is simple. For every  $\epsilon > 0$ , we have

$$\mathbb{E} [\text{distance}(x, \mathcal{B}_{\mathcal{N}})] \geq \epsilon \mathbb{P}(\text{distance}(x, \mathcal{B}_{\mathcal{N}}) > \epsilon),$$

with the probability on the right hand side scaling like

$$1 - \text{vol}_{n_{\text{in}}}(T_\epsilon(\mathcal{B}_{\mathcal{N}}) \cap K) / \text{vol}_{n_{\text{in}}}(K),$$

where  $T_\epsilon(\mathcal{B}_{\mathcal{N}})$  is the tube of radius  $\epsilon$  around  $\mathcal{B}_{\mathcal{N}}$ . We expect that its volume like  $\epsilon \text{vol}_{n_{\text{in}}-1}(\mathcal{B}_{\mathcal{N}})$ . Taking  $\epsilon = c/\#\{\text{neurons}\}$  yields the conclusion of Corollary 8.

## B. Outline of Proof of Theorem 6

The purpose of this section is to give an intuitive explanation of the proof of Theorem 3. We fix a non-linearity  $\phi : \mathbb{R} \rightarrow \mathbb{R}$  with breakpoints  $\xi_1 < \dots < \xi_T$  (as in (11)) and consider a fully connected network  $\mathcal{N}$  with input dimension  $n_{\text{in}} \geq 1$ , output dimension 1, and non-linearity  $\phi$ . For each neuron  $z$  in  $\mathcal{N}$ , we write

$$\ell(z) := \text{layer index of } z \quad (16)$$

and set

$$S_z := \{x \in \mathbb{R}^{n_{\text{in}}} \mid z(x) - b_z \in \{\xi_1, \dots, \xi_T\}\}. \quad (17)$$

We further

$$\tilde{S}_z := S_z \cap \mathcal{O}, \quad (18)$$

where

$$\mathcal{O} := \left\{ x \in \mathbb{R}^{n_{\text{in}}} \mid \forall j=1, \dots, d \exists \text{ neuron } z \text{ with } \ell(z)=j \text{ s.t. } \phi'(z(x)-b_z) \neq 0 \right\}.$$

Intuitively, the set  $S_z$  is the collection of inputs for which the neuron  $z$  turns from on to off. In contrast, the set  $\mathcal{O}$  is the collection of inputs  $x \in \mathbb{R}^{n_{\text{in}}}$  for which  $\mathcal{N}$  is open in the sense that there is a path from the input to the output of  $\mathcal{N}$  so that all neurons along this path compute are not constant in a neighborhood  $x$ . Thus,  $\tilde{S}_z$  is the set of inputs at which neuron  $z$  switches between its linear regions and at which the output of neuron  $z$  actually affects the function computed by  $\mathcal{N}$ .

We remark here that  $\mathcal{O} = \emptyset$  if in the non-linearity  $\phi$  there are no linear pieces at which the slopes on  $\phi$  equals 0 (i.e.  $q_j \neq 0$  for all  $j$  in the definition (11) of  $\phi$ ). If, for example,  $\phi$  is ReLU, then  $\mathcal{O}$  need not be empty.

The overall proof of Theorem 3 can be divided into several steps. The first gives the following representation of  $\mathcal{B}_{\mathcal{N}}$ .

**Proposition 9.** *Under Assumptions A1 and A2 of Theorem 3, we have, with probability 1,*

$$\mathcal{B}_{\mathcal{N}} = \bigcup_{\text{neurons } z} \tilde{S}_z.$$

The precise proof of Proposition 9 can be found in §C.1 below. The basic idea is that if for all  $y$  near a fixed input  $x \in \mathbb{R}^{n_{\text{in}}}$ , none of the pre-activations  $z(y) - b_z$  cross the boundary of a linear region for  $\phi$ , then  $x \notin \mathcal{B}_{\mathcal{N}}$ . Thus,  $\mathcal{B}_{\mathcal{N}} \subset \bigcup_z S_z$ . Moreover, if a neuron  $z$  satisfies  $z(x) - b_z = S_i$  for some  $i$  but there are no open paths from  $z$  to the output of  $\mathcal{N}$  for inputs near  $x$ , then  $z$  is dead at  $x$  and hence does not influence  $\mathcal{N}$  at  $x$ . Thus, we expect the more refined inclusion  $\mathcal{B}_{\mathcal{N}} \subset \bigcup_z \tilde{S}_z$ . Finally, if  $x \in \tilde{S}_z$  for some  $z$  then  $x \in \mathcal{B}_{\mathcal{N}}$  unless the contribution from other neurons to  $\nabla \mathcal{N}(y)$  for  $y$  near  $x$  exactly cancels the discontinuity in  $\nabla z(x)$ . This happens with probability 0.

The next step in proving Theorem 3 is to identify the portions of  $\mathcal{B}_{\mathcal{N}}$  of each dimension. To do this, we write for any distinct neurons  $z_1, \dots, z_k$ ,

$$\tilde{S}_{z_1, \dots, z_k} := \bigcap_{j=1}^k \tilde{S}_{z_j}.$$

The set  $\tilde{S}_{z_1, \dots, z_k}$  is, intuitively, the collection of inputs at which  $z_j(x) - b_{z_j}$  switches between linear regions for  $\phi$  and

at which the output of  $\mathcal{N}$  is affected by the post-activations of these neurons. Proposition 9 shows that we may represent  $\mathcal{B}_{\mathcal{N}}$  as a disjoint union

$$\mathcal{B}_{\mathcal{N}} = \bigcup_{k=1}^{n_{\text{in}}} \mathcal{B}_{\mathcal{N}, k},$$

where

$$\mathcal{B}_{\mathcal{N}, k} := \bigcup_{\substack{\text{distinct neurons} \\ z_1, \dots, z_k}} \tilde{S}_{z_1, \dots, z_k} \cap \left( \bigcup_{z \neq z_1, \dots, z_k} \tilde{S}_z \right)^c.$$

In words,  $\mathcal{B}_{\mathcal{N}, k}$  is the collection of inputs in  $\mathcal{O}$  at which exactly  $k$  neurons turn from on to off. The following Proposition shows that  $\mathcal{B}_{\mathcal{N}, k}$  is precisely the “ $(n_{\text{in}} - k)$ -dimensional piece of  $\mathcal{B}_{\mathcal{N}}$ ” (see (5)).

**Proposition 10.** *Fix  $k = 1, \dots, n_{\text{in}}$ , and  $k$  distinct neurons  $z_1, \dots, z_k$  in  $\mathcal{N}$ . Then, with probability 1, for every  $x \in \mathcal{B}_{\mathcal{N}, k}$  there exists a neighborhood in which  $\mathcal{B}_{\mathcal{N}, k}$  coincides with a  $(n_{\text{in}} - k)$ -dimensional hyperplane.*

We prove Proposition 10 in §C.2. The idea is that each  $\tilde{S}_{z_1, \dots, z_k}$  is piecewise linear and, with probability 1, at every point at which exactly the neurons  $z_1, \dots, z_k$  contribute to  $\mathcal{B}_{\mathcal{N}}$ , its co-dimension is the number of linear conditions needed to define it. Observe that with probability 1, the bias vector  $(b_{z_1}, \dots, b_{z_{k+1}})$  for any collection  $z_1, \dots, z_{k+1}$  of distinct neurons is a regular value for  $x \mapsto (z_1(x), \dots, z_{k+1}(x))$ . Hence,

$$\text{vol}_{n_{\text{in}} - k} \left( \tilde{S}_{z_1, \dots, z_{k+1}} \right) = 0.$$

Proposition 10 thus implies that, with probability 1,

$$\text{vol}_{n_{\text{in}} - k} (\mathcal{B}_{\mathcal{N}, k}) = \sum_{\substack{\text{distinct neurons} \\ z_1, \dots, z_k}} \text{vol}_{n_{\text{in}} - k} \left( \tilde{S}_{z_1, \dots, z_k} \right).$$

The final step in the proof of Theorem 3 is therefore to prove the following result.

**Proposition 11.** *Let  $z_1, \dots, z_k$  be distinct neurons in  $\mathcal{N}$ . Then, for any bounded, measurable  $K \subset \mathbb{R}^{n_{\text{in}}}$ ,*

$$\begin{aligned} & \mathbb{E} \left[ \text{vol}_{n_{\text{in}} - k} \left( \tilde{S}_{z_1, \dots, z_k} \right) \right] \\ &= \int_K \sum_{i_1, \dots, i_k=1}^T \mathbb{E} \left[ Y_{z_1, \dots, z_k}^{(S_{i_1}, \dots, S_{i_k})} (x) \right] dx, \end{aligned}$$

where  $Y_{z_1, \dots, z_k}^{(S_{i_1}, \dots, S_{i_k})}$  is defined as in (13).

We provide a detailed proof of Proposition 11 in §C.3. The intuition is that the image of the volume element  $dx$  under  $x \mapsto z(x) - S_i$  is the volume element

$$\|J_{z_1, \dots, z_k}(x)\| dx$$

from (13). The probability of an infinitesimal neighborhood  $dx$  of  $x$  belonging to a  $(n_{\text{in}} - k)$ -dimensional piece of  $\mathcal{B}_{\mathcal{N}}$  is therefore the probability

$$\rho_{b_{z_1}, \dots, b_{z_k}}(z_1(x) - S_{i_1}, \dots, z_k(x) - S_{i_k}) \times \|J_{z_1, \dots, z_k}(x)\| dx$$

that the vector of biases  $(b_{z_j}, j = 1, \dots, k)$  belongs to the image of  $dx$  under map  $(z_j(x) - S_{i_j}, j = 1, \dots, k)$  for some collection of breakpoints  $S_{i_j}$ . The formal argument uses the co-area formula (see (29) and (30)).

## C. Proof of Theorem 3

### C.1. Proof of Proposition 9

Recall that the non-linearity  $\phi : \mathbb{R} \rightarrow \mathbb{R}$  is continuous and piecewise linear with  $T$  breakpoints  $\xi_1 < \dots < \xi_T$ , so that, with  $\xi_0 = -\infty$ ,  $\xi_{T+1} = \infty$ , we have

$$t \in (\xi_i, \xi_{i+1}) \Rightarrow \phi(t) = q_i t + p_i$$

with  $q_i \neq q_{i+1}$ . For each  $x \in \mathbb{R}^{n_{\text{in}}}$ , write

$$\begin{aligned} Z_x^+ &:= \{z \mid z(x) - b_z \in (\xi_i, \xi_{i+1}) \text{ and } q_i \neq 0 \text{ for some } i\} \\ Z_x^- &:= \{z \mid z(x) - b_z \in (\xi_i, \xi_{i+1}) \text{ and } q_i = 0 \text{ for some } i\} \\ Z_x^0 &:= \{z \mid z(x) - b_z = \xi_i \text{ for some } i\} \end{aligned}$$

Intuitively,  $Z_x^+$  are the neurons that, at the input  $x$  are open (i.e. contribute to the gradient of the output  $\mathcal{N}(x)$ ) but do not change their contribution in a neighborhood of  $x$ ,  $Z_x^-$  are the neurons that are closed, and  $Z_x^0$  are the neurons that, at  $x$ , produce a discontinuity in the derivative of  $\mathcal{N}$ . Thus, for example, if  $\phi = \text{ReLU}$ , then

$$Z_x^* := \{z \mid \text{sgn}(z(x) - b_z) = *\}, \quad * \in \{+, -, 0\}.$$

We begin by proving that  $\mathcal{B}_{\mathcal{N}} \subseteq \bigcup_z \tilde{S}_z$  by checking the contrapositive

$$\left( \bigcup_z \tilde{S}_z \right)^c \subseteq \mathcal{B}_{\mathcal{N}}. \quad (19)$$

Fix  $x \in \left( \bigcup_z \tilde{S}_z \right)^c$ . Note that  $Z_x^\pm$  are locally constant in the sense that there exists  $\varepsilon > 0$  so that for all  $y$  with  $\|y - x\| < \varepsilon$ , we have

$$Z_x^- \subseteq Z_y^-, \quad Z_x^+ \subseteq Z_y^+, \quad Z_y^+ \cup Z_y^0 \subseteq Z_x^+ \cup Z_x^0. \quad (20)$$

Moreover, observe that if in the definition (11) of  $\phi$  none of the slopes  $q_i$  equal 0, then  $Z_y^- = \emptyset$  for every  $y$ . To prove (19), consider any path  $\gamma$  from the input to the output in the computational graph of  $\mathcal{N}$ . Such a path consists of  $d + 1$  neurons, one in each layer:

$$\gamma = (z_\gamma^{(0)}, \dots, z_\gamma^{(d)}), \quad \ell(z_\gamma^{(j)}) = j.$$

To each path we may associate a sequence of weights:

$$w_\gamma^{(j)} := \text{weight connecting } z_\gamma^{(j-1)} \text{ to } z_\gamma^{(j)}, \quad j = 1, \dots, d.$$

We will also define

$$q_\gamma^{(j)}(x) := \sum_{i=0}^T q_i \mathbf{1}_{\{z_\gamma^{(x)} - b_{z_\gamma^{(j)}} \in (\xi_i, \xi_{i+1}]\}}$$

For instance, if  $\phi = \text{ReLU}$ , then

$$q_\gamma^{(j)}(x) = \mathbf{1}_{\{z_\gamma^{(j)}(x) - b_z \geq 0\}},$$

and in general only one term in the definition of  $q_\gamma^{(j)}(x)$  is non-zero for each  $z$ . We may write

$$\mathcal{N}(y) = \sum_{i=1}^{n_{\text{in}}} y_i \sum_{\text{paths } \gamma: i \rightarrow \text{out}} \prod_{j=1}^d q_\gamma^{(j)}(y) w_\gamma^{(j)} + \text{constant}, \quad (21)$$

Note that if  $x \in \left( \bigcup_z \tilde{S}_z \right)^c$ , then for any path  $\gamma$  through a neuron  $z \in Z_x^0$ , we have

$$\exists j \text{ s.t. } z_\gamma^{(j)} \in Z_x^-.$$

This is an open condition in light of (20), and hence for all  $y$  in a neighborhood of  $x$  and for any path  $\gamma$  through a neuron  $z \in Z_x^0$  we also have that

$$\exists j \text{ s.t. } z_\gamma^{(j)} \in Z_y^-.$$

Thus, since the summand in (21) vanishes identically if  $\gamma \cap Z_y^- \neq \emptyset$ , we find that for  $y$  in a neighborhood of any  $x \in \left( \bigcup_z \tilde{S}_z \right)^c$  we may write

$$\mathcal{N}(y) = \sum_{i=1}^{n_{\text{in}}} y_i \sum_{\substack{\text{paths } \gamma: i \rightarrow \text{out} \\ \gamma \subset Z_x^+}} \prod_{j=1}^d q_\gamma^{(j)}(y) w_\gamma^{(j)} + \text{constant}. \quad (22)$$

But, again by (20), for any fixed  $x$ , all  $y$  in a neighborhood of  $x$  and each  $z \in Z_x^+$ , we have  $z \in Z_y^+$  as well. Thus, in particular,

$$z(x) - b_z \in (\xi_i, \xi_{i+1}) \Rightarrow z(y) - b_z \in (\xi_i, \xi_{i+1}).$$

Thus, for  $y$  sufficiently close to  $x$ , we have for every path in the sum (22) that

$$q_\gamma^{(j)}(y) = q_\gamma^{(j)}(x).$$

Therefore, the partial derivatives  $(\partial \mathcal{N} / \partial y_i)(y)$  are independent of  $y$  in a neighborhood of  $x$  and hence continuous at  $x$ . This proves (19). Let us now prove the reverse inclusion:

$$\bigcup_z \tilde{S}_z \subseteq \mathcal{B}_{\mathcal{N}} \quad (23)$$

Note that, with probability 1, we have

$$\text{vol}_{n_{\text{in}}-1}(S_{z_1} \cap S_{z_2}) = 0$$

for any pair of distinct neurons  $z_1, z_2$ . Note also that since  $x \mapsto \mathcal{N}(x)$  is continuous and piecewise linear, the set  $\mathcal{B}_{\mathcal{N}}$  is closed. Thus, it is enough to show the slightly weaker inclusion

$$\bigcup_z \left( \tilde{S}_z \setminus \bigcup_{\hat{z} \neq z} S_{\hat{z}} \right) \subseteq \mathcal{B}_{\mathcal{N}} \quad (24)$$

since the closure of  $\tilde{S}_z \setminus \bigcup_{\hat{z} \neq z} S_{\hat{z}}$  equals  $\tilde{S}_z$ . Fix a neuron  $z$  and suppose  $x \in \tilde{S}_z \setminus \bigcup_{\hat{z} \neq z} S_{\hat{z}}$ . By definition, we have that for every neuron  $\hat{z} \neq z$ , either

$$\hat{z} \in Z_x^+ \quad \text{or} \quad \hat{z} \in Z_x^-.$$

This has two consequences. First, by (20), the map  $y \mapsto z(y)$  is linear in a neighborhood of  $x$ . Second, in a neighborhood of  $x$ , the set  $\tilde{S}_z$  coincides with  $S_z$ . Hence, combining these facts, near  $x$  the set  $\tilde{S}_z$  coincides with the hyperplane

$$\{x \mid z(x) - b_z = \xi_i\}, \quad \text{for some } i. \quad (25)$$

We may take two sequences of inputs  $y_n^+, y_n^-$  on opposite sides of this hyperplane so that

$$\lim_{n \rightarrow \infty} y_n^+ = \lim_{n \rightarrow \infty} y_n^- = x$$

and

$$\phi'(z(y_n^+) - b_z) = q_i, \quad \phi'(z(y_n^-) - b_z) = q_{i-1}, \quad \forall n,$$

where the index  $i$  the same as the one that defines the hyperplane (25). Further, since  $\mathcal{B}_{\mathcal{N}}$  has co-dimension 1 (it is contained in the piecewise linear co-dimension 1 set  $\bigcup_z S_z$ , for example), we may also assume that  $y_n^+, y_n^- \notin \mathcal{B}_{\mathcal{N}}$ . Consider any path  $\gamma$  from the input to the output of the computational graph of  $\mathcal{N}$  passing through  $z$  (so that  $z = z_\gamma^{(j)} \in \gamma$ ). By construction, for every  $n$ , we have

$$q_\gamma^{(j)}(y_n^+) \neq q_\gamma^{(j)}(y_n^-),$$

and hence, after passing to a subsequence, we may assume that the symmetric difference

$$Z_{y_n^+}^+ \Delta Z_{y_n^-}^+ \neq \emptyset \quad (26)$$

of the paths that contribute to the representation (21) for  $y_n^+, y_n^-$  is fixed and non-empty (the latter since it always contains  $z$ ). For any  $y \notin \mathcal{B}_{\mathcal{N}}$ , we may write, for each  $i = 1, \dots, n_{\text{in}}$

$$\frac{\partial \mathcal{N}}{\partial y_i}(y) = \sum_{\substack{\text{paths } \gamma: i \rightarrow \text{out} \\ \gamma \subset Z_y^+}} \prod_{j=1}^d q_\gamma^{(j)}(y) w_\gamma^{(j)}. \quad (27)$$

Substituting into this expression  $y = y_n^\pm$ , we find that there exists a non-empty collection  $\Gamma$  of paths from the input to the output of  $\mathcal{N}$  so that

$$\frac{\partial \mathcal{N}}{\partial y_i}(y_n^+) - \frac{\partial \mathcal{N}}{\partial y_i}(y_n^-) = \sum_{\gamma \in \Gamma} a_\gamma \prod_{j=1}^d c_\gamma^{(j)} w_\gamma^{(j)}$$

where

$$a_\gamma \in \{-1, 1\}, \quad c_\gamma^{(j)} \in \{q_0, \dots, q_T\}.$$

Note that the expression above is a polynomial in the weights of  $\mathcal{N}$ . Note also that, by construction, this polynomial is not identically zero due to the condition (26). There are only finitely many such polynomials since both  $a_\gamma$  and  $c_\gamma^{(j)}$  range over a finite alphabet. For each such non-zero polynomial, the set of weights at which it vanishes has co-dimension 1. Hence, with probability 1, the difference  $\frac{\partial \mathcal{N}}{\partial y_i}(y_n^+) - \frac{\partial \mathcal{N}}{\partial y_i}(y_n^-)$  is non-zero. This shows that the partial derivatives  $\frac{\partial \mathcal{N}}{\partial y_i}$  are not continuous at  $x$  and hence that  $x \in \mathcal{B}_{\mathcal{N}}$ .  $\square$

## C.2. Proof of Proposition 10

Fix distinct neurons  $z_1, \dots, z_k$  and suppose  $x \in \tilde{S}_{z_1, \dots, z_k}$  but not in  $\tilde{S}_z$  for any  $z \neq z_1, \dots, z_k$ . After relabeling, we may assume that they are ordered by layer index:

$$\ell(z_1) \leq \dots \leq \ell(z_k).$$

Since  $x \in \mathcal{O}$ , we also have that  $x \notin S_z$  for any  $z \neq z_1, \dots, z_k$ . Thus, there exists a neighborhood  $U$  of  $x$  so  $S_z \cap U = \emptyset$  for every  $z \neq z_1, \dots, z_k$ . Thus, there exists a neighborhood of  $x$  on which  $y \mapsto z_1(y)$  is linear.

Hence, as explained near (25) above,  $\tilde{S}_{z_1}$  is a hyperplane near  $x$ . We now restrict our inputs to this hyperplane and repeat this reasoning to see that, near  $x$ , the set  $\tilde{S}_{z_1, z_2}$  is a hyperplane inside  $\tilde{S}_{z_1}$  and hence, near  $x$ , is the intersection of two hyperplanes in  $\mathbb{R}^{n_{\text{in}}}$ . Continuing in this way shows that in a neighborhood of  $x$ , the set  $\tilde{S}_{z_1, \dots, z_k}$  is equal to the intersection of  $k$  hyperplanes in  $\mathbb{R}^{n_{\text{in}}}$ . Thus,  $\tilde{S}_{z_1, \dots, z_k} \setminus \left( \bigcup_{z \neq z_1, \dots, z_k} \tilde{S}_z \right)^c$  is precisely the intersection of  $k$  hyperplanes in a neighborhood of each of its points.  $\square$

## C.3. Proof of Proposition 11

Let  $z_1, \dots, z_k$  be distinct neurons in  $\mathcal{N}$ , and fix a compact set  $K \subset \mathbb{R}^{n_{\text{in}}}$ . We seek to compute the mean of  $\text{vol}_{n_{\text{in}}-k}(\tilde{S}_{z_1, \dots, z_k} \cap K)$ , which we may rewrite as

$$\begin{aligned} & \int_{S_{z_1, \dots, z_k} \cap K} \mathbf{1}_{\left\{ \begin{array}{l} z_j \text{ is good at } x \\ j=1, \dots, k \end{array} \right\}} \text{dvol}_{n_{\text{in}}-k}(x) \quad (28) \\ &= \sum_{i_1, \dots, i_k=1}^T \int_{S_{z_1, \dots, z_k}^{(\xi_{i_1}, \dots, \xi_{i_k})} \cap K} \mathbf{1}_{\left\{ \begin{array}{l} z_j \text{ is good at } x \\ j=1, \dots, k \end{array} \right\}} \text{dvol}_{n_{\text{in}}-k}(x), \end{aligned}$$

where we've set

$$S_{z_1, \dots, z_k}^{(\xi_{i_1}, \dots, \xi_{i_k})} = \{x \mid z_j(x) - b_{z_j} = \xi_{i_j}, j = 1, \dots, k\}.$$

Note that the map  $x \mapsto (z_1(x), \dots, z_k(x))$  is Lipschitz, and recall the co-area formula, which says that if  $\psi \in L^1(\mathbb{R}^n)$  and  $g : \mathbb{R}^n \rightarrow \mathbb{R}^m$  with  $m \leq n$  is Lipschitz, then

$$\int_{\mathbb{R}^m} \int_{g^{-1}(t)} \psi(x) \, \text{dvol}_{n-m}(x) dt \quad (29)$$

equals

$$\int_{\mathbb{R}^n} \psi(x) \|Jg(x)\| \, \text{dvol}_n(x), \quad (30)$$

where  $Jg$  is the  $m \times n$  Jacobian of  $g$  and

$$\|Jg(x)\| = \det((Jg(x))(Jg(x))^T)^{1/2}.$$

We assumed that the biases  $b_{z_1}, \dots, b_{z_k}$  have a joint conditional density

$$\rho_{\mathbf{b}_z} = \rho_{b_{z_1}, \dots, b_{z_k}}$$

given all other weights and biases. The mean of the term in (28) corresponding to a fixed  $\xi = (\xi_{i_1}, \dots, \xi_{i_k})$  over the conditional distribution of  $b_{z_1}, \dots, b_{z_k}$  is therefore

$$\int_{\mathbb{R}^k} d\mathbf{b} \rho_{\mathbf{b}_z}(\mathbf{b}) \int_{\{\mathbf{z}-\mathbf{b}=\xi\} \cap K} \mathbf{1}_{\{z_j \text{ is good at } x\}} \, \text{dvol}_{n_{\text{in}}-k}(x),$$

where we've abbreviated  $\mathbf{b} = (b_1, \dots, b_k)$  as well as  $\mathbf{z}(x) = (z_1(x), \dots, z_k(x))$ . This can be rewritten as

$$\int_{\mathbb{R}^k} d\mathbf{b} \int_{\{\mathbf{z}=\mathbf{b}\} \cap K} \rho_{\mathbf{b}_z}(\mathbf{z}(x)-\xi) \mathbf{1}_{\{z_j \text{ is good at } x\}} \, \text{dvol}_{n_0-k}(x).$$

Thus, applying the co-area formula (29), (30) shows that the average of (28) over the conditional distribution of  $b_{z_1}, \dots, b_{z_k}$  is precisely

$$\int_K Y_{z_1, \dots, z_k}(x) \, dx.$$

Taking the average over the remaining weights and biases, we may commute the expectation  $\mathbb{E}[\cdot]$  with the  $dx$  integral since the integrand is non-negative. This completes the proof of Proposition 11.  $\square$

## D. Proof of Corollary 7

We begin by proving the upper bound in (15). By Theorem 3,  $\mathbb{E}[\text{vol}(\mathcal{B}_{\mathcal{N}, k} \cap K)]$  equals

$$\sum_{\text{distinct neurons } z_1, \dots, z_k} \sum_{i_1, \dots, i_k=1}^T \int_K \mathbb{E} \left[ Y_{z_1, \dots, z_k}^{(\xi_{i_1}, \dots, \xi_{i_k})}(x) \right] (x) dx,$$

where, as in (13),  $Y_{z_1, \dots, z_k}^{(\xi_{i_1}, \dots, \xi_{i_k})}(x)$  is

$$\|J_{z_1, \dots, z_k}(x)\| \rho_{b_{z_1}, \dots, b_{z_k}}(z_1(x) - \xi_{i_1}, \dots, z_k(x) - \xi_{i_k})$$

times the indicator function of the event that  $z_j$  is good at  $x$  for every  $j$ . When the weights and biases of  $\mathcal{N}$  are independent, we may write  $\rho_{b_{z_1}, \dots, b_{z_k}}(b_1, \dots, b_k)$  as

$$\prod_{j=1}^k \rho_{b_{z_j}}(b_j) \leq \left( \sup_{\text{neurons } z} \sup_{b \in \mathbb{R}} \rho_{b_z}(b) \right)^k = C_{\text{bias}}^k.$$

Hence,

$$Y_{z_1, \dots, z_k}(x) \leq C_{\text{bias}}^k \left( \det \left( J_{z_1, \dots, z_k}(x) (J_{z_1, \dots, z_k}(x))^T \right) \right)^{1/2}.$$

Note that

$$J_{z_1, \dots, z_k}(x) (J_{z_1, \dots, z_k}(x))^T = \text{Gram}(\nabla z_1(x), \dots, \nabla z_k(x)),$$

where for any  $v_i \in \mathbb{R}^n$

$$\text{Gram}(v_1, \dots, v_k)_{i,j} = \langle v_i, v_j \rangle$$

is the associated Gram matrix. The Gram identity says that

$$\det \left( J_{z_1, \dots, z_k}(x) (J_{z_1, \dots, z_k}(x))^T \right)^{1/2} \text{ equals}$$

$$\|\nabla z_1(x) \wedge \dots \wedge \nabla z_k(x)\|,$$

which is the  $k$ -dimensional volume of the paralleliped in  $\mathbb{R}^{n_{\text{in}}}$  spanned by  $\{\nabla z_j(x), j = 1, \dots, k\}$ . We thus have

$$\det \left( J_{z_1, \dots, z_k}(x) (J_{z_1, \dots, z_k}(x))^T \right)^{1/2} \leq \prod_{j=1}^k \|\nabla z_j(x)\|.$$

The estimate (14) proves the upper bound (15). For the special case of  $\phi = \text{ReLU}$  we use the AM-GM inequality and Jensen's inequality to write

$$\begin{aligned} \mathbb{E} \left[ \prod_{j=1}^k \|\nabla z_j(x)\| \right] &\leq \mathbb{E} \left[ \left( \frac{1}{k} \sum_{j=1}^k \|\nabla z_j(x)\| \right)^k \right] \\ &\leq \frac{1}{k} \sum_{j=1}^k \mathbb{E} \left[ \|\nabla z_j\|^k \right]. \end{aligned}$$

Therefore, by Theorem 1 of Hanin & Nica (2018), there exist  $C_1, C_2 > 0$  so that

$$\mathbb{E} \left[ \prod_{j=1}^k \|\nabla z_j(x)\| \right] \leq \left( C_1 e^{C_2 \sum_{j=1}^d \frac{1}{n_j}} \right)^k.$$

This completes the proof of the upper bound in (15). To prove the power bound, lower bound in (15) we must argue in a different way. Namely, we will induct on  $k$  and use the following facts to prove the base case  $k = 1$ :

1. At initialization, for each fixed input  $x$ , the random variables  $\{\mathbf{1}_{\{z(x) > b_z\}}\}$  are independent Bernoulli random variables with parameter  $1/2$ . This fact is proved in Proposition 2 of Hanin & Nica (2018). In particular, the event  $\{z \text{ is good at } x\}$ , which occurs when there exists a layer  $j \in \ell(z) + 1, \dots, d$  in which  $z(x) \leq b_z$  for every neuron, is independent of  $\{z(x), b_z\}$  and satisfies

$$\mathbb{P}(z \text{ is good at } x) \geq 1 - \sum_{j=1}^d 2^{-n_j}. \quad (31)$$

2. At initialization, for each fixed input  $x$ , we have

$$\frac{1}{2} \mathbb{E}[z(x)^2] = \frac{\|x\|^2}{n_{\text{in}}} + \sum_{j=1}^{\ell(z)} \sigma_{b_j}^2, \quad (32)$$

where  $\sigma_{b_j}^2 := \text{Var}[\text{biases at layer } j]$ . This is Equation (11) in the proof of Theorem 5 from Hanin & Rolnick (2018).

3. At initialization, for every neuron  $z$  and each input  $x$ , we have

$$\mathbb{E}[\|\nabla z(x)\|^2] = 2. \quad (33)$$

This follows easily from Theorem 1 of Hanin (2018).

4. At initialization, for each  $1 \leq j \leq n_{\text{in}}$  and every  $x \in \mathbb{R}^{n_{\text{in}}}$

$$\mathbb{E} \left[ \log \left( n_{\text{in}} \left( \frac{\partial z}{\partial x_j}(x) \right)^2 \right) \right] = -\frac{5}{2} \sum_{j=1}^{\ell(z)} \frac{1}{n_j} \quad (34)$$

plus  $O\left(\sum_{j=1}^{\ell(z)} \frac{1}{n_j^2}\right)$ , where  $n_j$  is the width of the  $j^{\text{th}}$  hidden layer and the implied constant depends only on the 4<sup>th</sup> moment of the measure  $\mu$  according to which weights are distributed. This estimate follows immediately by combining Corollary 26 and Proposition 28 in Hanin & Nica (2018).

We begin by proving the lower bound in (15) when  $k = 1$ . We use (31) to see that  $\mathbb{E}[\text{vol}_{n_{\text{in}}-1}(\mathcal{B}_{\mathcal{N}} \cap K)]$  is bounded below by

$$\left(1 - \sum_{j=1}^d 2^{-n_j}\right) \sum_{\text{neurons } z} \int_K \mathbb{E}[\|\nabla z(x)\| \rho_{b_z}(z(x))] dx.$$

Next, we bound the integrand. Fix  $x \in \mathbb{R}^{n_{\text{in}}}$  and a parameter  $\eta > 0$  to be chosen later. The integrand  $\mathbb{E}[\|\nabla z(x)\| \rho_{b_z}(z(x))]$  is bounded below by

$$\begin{aligned} & \mathbb{E}[\|\nabla z(x)\| \rho_{b_z}(z(x)) \mathbf{1}_{\{|z(x)| \leq \eta\}}] \\ & \geq \left[ \inf_{|b| \leq \eta} \rho_{b_z}(b) \right] \mathbb{E}[\|\nabla z(x)\| \mathbf{1}_{\{|z(x)| \leq \eta\}}], \end{aligned}$$

which is bounded below by

$$\left[ \inf_{|b| \leq \eta} \rho_{b_z}(b) \right] \left[ \mathbb{E}[\|\nabla z(x)\|] - \mathbb{E}[\|\nabla z(x)\| \mathbf{1}_{\{|z(x)| > \eta\}}] \right].$$

Using Cauchy-Schwarz, the term  $\mathbb{E}[\|\nabla z(x)\| \mathbf{1}_{\{|z(x)| > \eta\}}]$  is bounded above by

$$\left( \mathbb{E}[\|\nabla z(x)\|^2] \mathbb{P}(|z(x)| > \eta) \right)^{1/2},$$

which using (33) and (32) together with Markov's inequality, is bounded above by

$$\frac{2}{\eta^{1/2}} \left( \frac{\|x\|^2}{n_{\text{in}}} + \sum_{j=1}^{\ell(z)} \sigma_{b_j}^2 \right)^{1/2}.$$

Next, using Jensen's inequality twice, we write

$$\begin{aligned} \log \mathbb{E}[\|\nabla z(x)\|] & \geq \frac{1}{2} \mathbb{E} \left[ \log \left( \|\nabla z(x)\|^2 \right) \right] \\ & = \frac{1}{2} \mathbb{E} \left[ \log \left( \sum_{j=1}^{n_{\text{in}}} \left( \frac{\partial z}{\partial x_j}(x) \right)^2 \right) \right] \\ & \geq \frac{1}{2} \mathbb{E} \left[ \log \left( n_{\text{in}}^{1/2} \frac{\partial z}{\partial x_j}(x) \right)^2 \right] \\ & = -\frac{5}{4} \sum_{j=1}^{\ell(z)} \frac{1}{n_j} + O \left( \sum_{j=1}^{\ell(z)} \frac{1}{n_j^2} \right), \end{aligned}$$

where in the last inequality we applied (34). Putting this all together, we find that exists  $c > 0$  so that

$$\mathbb{E}[\|\nabla z(x)\| \rho_{b_z}(z(x))] \geq c \left[ \inf_{|b| \leq \eta} \rho_{b_z}(b) \right],$$

where

$$\eta \geq 4 \left( \frac{\|x\|^2}{n_{\text{in}}} + \sum_{j=1}^d \sigma_{b_j}^2 \right) e^{\frac{5}{4} \sum_{j=1}^d \frac{1}{n_j} + O\left(\sum_{j=1}^{\ell(z)} \frac{1}{n_j^2}\right)}.$$

In particular, we may take

$$\eta = \left( \frac{\sup_{x \in K} \|x\|^2}{n_{\text{in}}} + \sum_{j=1}^d \sigma_{b_j}^2 \right) e^{C \sum_{j=1}^d \frac{1}{n_j}}$$

for  $C$  sufficiently large. This completes the proof of the lower bound in (15) when  $k = 1$ . To complete the proof of Corollary 7, suppose we have proved the lower bound in (15) for all ReLU networks  $\mathcal{N}$  and all collections of  $k - 1$  distinct neurons. We may assume after relabeling that the neurons  $z_1, \dots, z_k$  are ordered by layer index:

$$\ell(z_1) \leq \dots \leq \ell(z_k).$$

With probability 1, the set  $S_{z_1} \subset \mathbb{R}^{n_{\text{in}}}$  is piecewise linear, co-dimension 1 with finitely many pieces, which we denote by  $P_\alpha$ . We may therefore rewrite  $\text{vol}_{n_{\text{in}}-k}(\tilde{S}_{z_1, \dots, z_k} \cap K)$  as

$$\sum_{\alpha} \text{vol}_{n_{\text{in}}-k}(\tilde{S}_{z_2, \dots, z_k} \cap P_\alpha \cap K).$$

We now define a new neural network  $\mathcal{N}_\alpha$ , obtained by restricting  $\mathcal{N}$  to  $P_\alpha$ . The input dimension for  $\mathcal{N}_\alpha$  equals  $n_{\text{in}} - 1$ , and the weights and biases of  $\mathcal{N}_\alpha$  satisfy all the assumptions of Corollary 7. We can now apply our inductive hypothesis to the  $k - 1$  neurons  $z_2, \dots, z_k$  in  $\mathcal{N}_\alpha$  and to the set  $K \cap P_\alpha$ . This gives

$$\begin{aligned} & \mathbb{E} \left[ \sum_{\alpha} \text{vol}_{n_{\text{in}}-k}(\tilde{S}_{z_2, \dots, z_k} \cap P_\alpha \cap K) \right] \\ & \geq \left( \inf_z \inf_{|b| \leq \eta} \rho_{b_z}(b) \right)^{k-1} \mathbb{E}[\text{vol}_{n_{\text{in}}-1}(P_\alpha \cap K)]. \end{aligned}$$

Summing this lower bound over  $\alpha$  yields

$$\begin{aligned} & \mathbb{E}[\text{vol}_{n_{\text{in}}-k}(\tilde{S}_{z_1, \dots, z_k} \cap K)] \\ & \geq \left( \inf_z \inf_{|b| \leq \eta} \rho_{b_z}(b) \right)^{k-1} \mathbb{E}[\text{vol}_{n_{\text{in}}-1}(\tilde{S}_{z_1} \cap K)]. \end{aligned}$$

Applying the inductive hypothesis once more completes the proof.  $\square$

## E. Proof of Corollary 8

We will need the following observation.

**Lemma 12.** *Fix a positive integer  $n \geq 1$ , and let  $S \subseteq \mathbb{R}^n$  be a compact continuous piecewise linear submanifold with finitely many pieces. Define  $S_0 = \emptyset$  and let  $S_k$  be the union of the interiors of all  $k$ -dimensional pieces of  $S \setminus (S_0 \cup \dots \cup S_{k-1})$ . Denote by  $T_\varepsilon(X)$  the  $\varepsilon$ -tubular neighborhood of any  $X \subset \mathbb{R}^n$ . We have*

$$\text{vol}_n(T_\varepsilon(S)) \leq \sum_{k=0}^n \omega_{n-k} \varepsilon^{n-k} \text{vol}_k(S_k),$$

where  $\omega_d := \text{volume of ball of radius 1 in } \mathbb{R}^d$ .

*Proof.* Define  $d$  to be the maximal dimension of the linear pieces in  $S$ . Let  $x \in T_\varepsilon(S)$ . Suppose  $x \notin T_\varepsilon(S_k)$  for all  $k = 0, \dots, d-1$ . Then the intersection of the ball of radius  $\varepsilon$  around  $s$  with  $S$  is a ball inside  $S_d \cong U \subset \mathbb{R}^d$ . Using the convexity of this ball, there exists a point  $y$  in  $S_d$  so that the vector  $x - y$  is parallel to the normal vector to  $S_d$  at  $y$ . Hence,  $x$  belong to the normal  $\varepsilon$ -ball bundle  $B_\varepsilon(N^*(S_d))$  (i.e. the union of the fiber-wise  $\varepsilon$ -balls in the normal bundle to  $S_d$ ). Therefore, we have

$$\text{vol}_n(T_\varepsilon(S)) \leq \text{vol}_n(B_\varepsilon(N^*(S_d))) + \text{vol}_n(T_\varepsilon(S_{\leq d-1})),$$

where we abbreviated  $S_{\leq d-1} := \bigcup_{k=0}^{d-1} S_k$ . Using that

$$\begin{aligned} \text{vol}_n(B_\varepsilon(N^*(S_d))) &= \text{vol}_d(S_d) \text{vol}_{n-d}(B_\varepsilon(\mathbb{R}^{n-d})) \\ &= \text{vol}_d(S_d) \varepsilon^{n-d} \omega_{n-d} \end{aligned}$$

and repeating this argument  $d - 1$  times completes the proof.  $\square$

We are now ready to prove Corollary 2. Let  $x \in K = [0, 1]^{n_{\text{in}}}$  be uniformly chosen. Then, for any  $\varepsilon > 0$ , using Markov's inequality and Lemma 12, we have

$$\begin{aligned} & \mathbb{E}[\text{distance}(x, \mathcal{B}_\mathcal{N})] \\ & \geq \varepsilon \mathbb{P}(\text{distance}(x, \mathcal{B}_\mathcal{N}) > \varepsilon) \\ & = \varepsilon (1 - \mathbb{P}(\text{distance}(x, \mathcal{B}_\mathcal{N}) \leq \varepsilon)) \\ & = \varepsilon (1 - \mathbb{E}[\text{vol}_{n_{\text{in}}}(T_\varepsilon(\mathcal{B}_\mathcal{N}))]) \\ & \geq \varepsilon \left( 1 - \sum_{k=1}^{n_{\text{in}}} \omega_{n_{\text{in}}-k} \varepsilon^{n_{\text{in}}-k} \mathbb{E}[\text{vol}_{n_{\text{in}}-k}(\mathcal{B}_{\mathcal{N},k})] \right) \\ & \geq \varepsilon \left( 1 - \sum_{k=1}^{n_{\text{in}}} (C_{\text{grad}} C_{\text{bias}} \varepsilon \#\{\text{neurons}\})^k \right) \\ & \geq \varepsilon (1 - C' C_{\text{grad}} C_{\text{bias}} \varepsilon \#\{\text{neurons}\}) \end{aligned}$$

for some  $C' > 0$ . Taking  $\varepsilon$  to be a small constant times  $1/(C_{\text{grad}} \#\{\text{neurons}\})$  completes the proof.  $\square$
